1 **Varietal differences in physiological and biochemical responses to salinity stress**  
2 **in six finger millet plants**

3

4 Asunta Mukami<sup>†1</sup>, Alex Ng'etich<sup>2</sup>, Easter Syombua<sup>3</sup>, Richard Oduor<sup>4</sup>, Wilton  
5 Mbinda<sup>†5\*</sup>

6

7 <sup>1</sup>Department of Life Sciences, South Eastern Kenya University, Kitui, Kenya

8

9 <sup>2</sup>Institute of Biotechnology Research, Jomo Kenyatta University of Agriculture  
10 Technology, Nairobi, Kenya

11

12 <sup>3</sup>Centre for Biotechnology and Bioinformatics, University of Nairobi, Kenya.

13

14 <sup>4</sup>Department of Biochemistry, Microbiology and Biotechnology, Kenyatta University,  
15 Nairobi, Kenya

16

17 <sup>5</sup>Department of Biochemistry and Biotechnology, Pwani University, Kilifi, Kenya

18

19 †contributed equally

20

21 \*Corresponding author: Wilton Mbinda; Email: [wilton.mbinda@gmail.com](mailto:wilton.mbinda@gmail.com)

22

23

24 **Abstract**

25 Finger millet is one of the most important cereals that are often grown in semiarid and  
26 arid regions of East-Africa. Salinity is known to be a major impediment for the crop  
27 growth and production. This study was aimed to understand the mechanisms of  
28 physiological and biochemical responses to salinity stress of Kenyan finger millet  
29 varieties (GBK043137, GBK043128, GBK043124, GBK043122, GBK043094,  
30 GBK043050) grown across different agroecological zones under NaCl-induced  
31 salinity stress. Seeds were germinated on the sterile soil and treated using various  
32 concentrations of NaCl (100, 200 and 300 mM) for two weeks. Again, the early-  
33 seedling stage of germinated plants was irrigated with the same salt concentrations for  
34 60 days. Results indicated depression in germination percentage, shoot and root  
35 growth rate, leaf relative water content, chlorophyll content contents, leaf  $K^+$   
36 concentration, and leaf  $K^+/Na^+$  ratios increased salt levels. Contrary, proline and  
37 malonaldehyde (MDA) contents reduced sugar content and leaf total proteins. At the  
38 same time, the leaf  $Na^+$  and  $Cl^-$  amounts of all plants increased substantially with  
39 rising stress levels. Clustering analysis revealed that GBK043094 and GBK043137  
40 were placed together and identified as salt-tolerant varieties based on their  
41 performance under salt stress. Overall, our findings indicated a significant varietal  
42 variability for most of the parameters analysed. These superior varieties identified  
43 could be potentially used as promising genetic resources in future breeding  
44 programmes development directed towards salt-tolerant finger millet hybrids. Further  
45 analysis at genomic level need to be undertaken to better understand the genetic  
46 factors that promote salinity tolerance in finger millet.

47

48 **Key words:** Finger millet, germination, plant response, salinity stress, salt tolerance,  
49 seedling

50

51 **Introduction**

52 Salinity is the severest environmental stress that adversely affects the growth of plants  
53 and their productivity worldwide (Qadir et al. 2014). This abiotic stress mostly  
54 characterizes arid and semiarid regions that experience low rainfall and scarcity of  
55 good quality water. Salts accumulation in irrigation without proper drainage water  
56 system, coupled with underlying rocks rich with high salts contents, leads to gradual  
57 salinization of arable land, thereby affecting soil characteristics. The problem is  
58 expected to aggravate further owing to effects of rising sea levels and climate change  
59 (Tedeschi et al., 2011). It is estimated that if existing salinity stress phenomenon will  
60 continue to persist, more than 50% of the current cultivated agricultural land could be  
61 lost by the year 2050 (Wang et al., 2003). As of 2013, the global losses in agricultural  
62 production due to lands afflicted by salinity had touched US\$12 billion and have been  
63 steadily rising ever since (Shabala, 2013).

64

65 Over time, plants have evolved complex salt tolerance adaptive mechanisms to  
66 counteract the harmful effects of salinity through activation of morphological,  
67 physiological biochemical, cellular and molecular responses which include changes to  
68 metabolic systems, nutritional disproportion, variation and disorder of membranes and  
69 reduction in rate of cell division and growth (Munns et al., 2006; Zhu, 2003). Another  
70 critical repercussion of salinity stress to plants is the overproduction of reactive  
71 oxygen species (ROS) from the pathways such as photosynthesis, mitochondrial  
72 respiration and photorespiration. ROS toxicity comes from their reactions with  
73 various cell units, which precipitates an avalanche of oxidative reactions and results to  
74 enzymes inactivation, protein degradation, lipid peroxidation and DNA damage  
75 (reference). Collectively, these effects inhibit growth and development and  
76 subsequently reduce crop yields. The most effective way to combat against salinity is  
77 the development of the resistant and tolerant crop varieties. It is therefore paramount  
78 to identify the genetic resources with high tolerance, and to understand the  
79 mechanisms of salinity tolerance in crops.

80

81 The resistance and response of plants to a salt stress varies according to its species or  
82 varieties or genotypes or variety and environment which could be attributed to the

83 biological dissimilarities between the species or varieties or genotypes, plant growth,  
84 and composition and concentration of the salt stress conditions (Bertazzini et al.,  
85 2018; Filichkin et al., 2018; Shabala et al., 2013). Many reports have shown that short  
86 term salinity stress significantly affects the germination rate, seedling and root growth  
87 as well as ion composition, levels of relative water content, photosynthetic pigments,  
88 proline content, level of membrane lipid peroxidation as well as the amounts of  
89 reducing sugars and total protein (Dugasa et al., 2019; Sarabi et al., 2017; Kumar and  
90 Khare, 2016). These physiological and biochemical indices multivariate cluster  
91 analysis been used for classification of salt-sensitive and salt-tolerant varieties so that  
92 they can further be used in plant breeding programmes. The prevalent approach to  
93 assess the performance of plants against salinity under laboratory conditions is  
94 through assessing their physiological and biochemical responses on the application of  
95 different concentrations NaCl.

96  
97 Finger millet, *Eleusine coracana* L. (Gearn), is the 4<sup>th</sup> most important member of  
98 millets after sorghum, pearl millet and foxtail millet, making it one of the most  
99 valuable food cereals cultivated in arid and semi-arid regions of Asia and Africa  
100 (Chivenge et al., 2015). The crop is well adapted to heat, drought and poor soil stress  
101 in marginal and degraded soils. Further, its cereals have comparatively better  
102 antioxidant and nutraceutical properties and superb storage qualities which lack in  
103 other cereals (Kumar et al., 2016). All these attributes make finger millet one of the  
104 important and promising plant genetics resources for agriculture, and food and  
105 nutritional security and alleviation of poverty of poor farmers who live in arid,  
106 infertile and marginal lands. Despite its importance, finger millet potential yields are  
107 adversely affected salinity stress. More specifically, during seed germination and  
108 seedling establishment terminal growth phases are extremely susceptible to salinity  
109 stress (Ibrahim, 2016; Hema et al., 2014; Zhang et al., 2014). Hence, it is imperative  
110 to screen for varieties with intrinsic salinity tolerance for yield improvement breeding  
111 programmes. Salinity tolerance during germination and seedling development is  
112 crucial for the establishment of plants growing in saline soils of arid and semi-arid  
113 regions (Tlig et al., 2008). Accordingly, understanding the physiological and  
114 biochemical salinity responses in finger millet is, therefore, of importance in breeding

115 salt resistant and tolerant crops. Owing to the wide disparity in agroecological regions  
116 across finger millet growing regions, several finger millet landraces exhibit an  
117 adaptation to a large range of environmental conditions and subsequently, represent  
118 valuable source of useful genetic source that can be exploited to improve salinity  
119 tolerance of finger millet varieties belong to distinct geographical zones in Kenya. We  
120 therefore investigated the physiological and biochemical responses to salinity stress of  
121 six finger millet varieties under NaCl induced salinity stress.

122

## 123 **Materials and methods**

### 124 **Plant material, treatments and germination assays**

125 Six Kenyan farmers preferred finger millet varieties (GBK043124, GBK043122,  
126 GBK043137, GBK043128, GBK043094 and GBK043050) obtained from Kenya  
127 Agricultural and Livestock Research Organization, Gene Bank, Muguga, Kenya were  
128 used in this study. Prior to assays, the seeds were sorted by handpicking of the healthy  
129 ones, then washed with distilled water to remove dust and other particles.  
130 Germination assay was performed using 10 seeds of each variety and at different  
131 concentrations of NaCl (100,200 and 300 mM). Seeds were planted in germination  
132 trays in round pots containing sterile soil to a depth of approximately 1 cm. The  
133 control seeds were irrigated with distilled water. Salinity stress was imposed on  
134 treatment groups by irrigating the seeds with various concentrations of NaCl at an  
135 interval of 3 days for two weeks. Observations on the rate of germination were scored  
136 on the 17<sup>th</sup> day of treatment.

137

### 138 **Growth conditions under salinity treatment**

139 Germinated finger millet seedlings were grown for 2 weeks under greenhouse  
140 conditions of  $25\pm 2$  °C and 60-70% humidity, with a 16/8-h photoperiod provided by  
141 natural sunlight. To assay salinity stress effects on growth of finger millet, the  
142 seedlings were subjected to stress by irrigating with NaCl (100, 200 and 300 mM) for  
143 21 days at an interval of 3 days. Control plants were watered with distilled water. In  
144 each experiment, five replications were used for each set of treatment. After  
145 treatment, five plants from each treatment were sampled at random and the growth of  
146 the plants studied by recording the shoot length and root length.

147

#### 148 **Relative water content**

149 One leaflet from the first fully expanded leaf of five plants per variety and per  
150 treatment was cut from a plant on the 21<sup>st</sup> day. Immediately after cutting, the leaflet  
151 was weighed to obtain the fresh weight (FW). Thereafter, the leaflet was immersed in  
152 deionized water under normal room temperature for 4 hours. Afterwards, the leaflet  
153 was taken out, thoroughly wiped to remove the water on the blade surface and its  
154 weight measured to obtain turgid weight (TW). the leaflet was afterwards dried in an  
155 oven for 24 hours and its dry weight (DW) measured. The relative water content  
156 (RWC %) was calculated using the formula:  $RWC = [(FW - DW) / (TW - DW)] \times 100$ .

157

#### 158 **Determination of chlorophyll content**

159 Chlorophyll a, b and total chlorophylls (a + b) were determined according to Arnon  
160 (1949). 0.2g of fresh leaves were taken from 21 days-old NaCl (0-300mM) treated  
161 plants, finely ground by vortexing several times to remove chlorophyll efficiently.  
162 The extract was centrifuged at 5000 g for 3 minutes. The absorbance of the obtained  
163 supernatants was measured at 645 and 663 nm using 1240 UV-Vis Spectrophotometer  
164 (Shimadzu, Kyoto, Japan). The total chlorophyll content in each sample, expressed in  
165 mg/g fresh mass (FM) was calculated using Arnon's 1949 formula:  $TC = 20.2(A_{645})$   
166  $+ 8.02(A_{663}) \times V / 1000 \times W$  where V corresponds to the volume of total extract per  
167 litre and W is the mass of the fresh material.

168

#### 169 **Proline content measurement**

170 Proline accumulation was determined as described by Bates et al. (1973). Fifty  
171 milligrams of fresh leaf tissues from each variety and treatment was homogenized in  
172 10 ml of 3% w/v sulphosalicylic acid and the homogenate was filtrated. The resulting  
173 solution was mixed solution of acidic ninhydrin [40% (w/v) acidic ninhydrin (8.8  $\mu$ M  
174 ninhydrin, 10.5 M glacial acetic acid, 2.4 M orthophosphoric acid), 40% (v/v) glacial  
175 acetic acid and 20% (v/v) of 3%(v/v) sulphosalicylic acid]. Thereafter, the reaction  
176 mixtures were put in a water bath at 100 °C for 60 minutes to develop colors and the  
177 reaction was terminated by incubating the mixtures in ice for 5 minutes. Toluene was  
178 added to separate chromophores. The optical density was measured at 520 nm using

179 1240 UV-Vis Spectrophotometer. Proline content [ $\mu\text{mol/g}$  fresh weight (F. WT)] in  
180 leaf tissues was calculated from a standard curve made using 0-100  $\mu\text{g}$  L-proline.

181

### 182 **Lipid peroxidation assay**

183 Fresh upper second fully expanded leaves (0.3 g) harvested and homogenized in 0.1  
184 % (w/v) trichloroacetic acid and then the homogenates were centrifuged at 10,000 g  
185 for 15 minutes at 4 °C. The supernatant was mixed with 0.5 ml of 1.5 ml 0.5%  
186 thiobarbituric acid diluted in 20% trichloroacetic acid and the mixture was incubated  
187 in water bath at 95 °C for 25 minutes before incubating it on ice for 10 minutes. The  
188 absorbance was measured at 532 and 600 nm using UVmini-1240 UV-Vis  
189 Spectrophotometer with 1% thiobarbituric acid in 20% trichloroacetic acid as control.  
190 The amount of malondialdehyde ( $\mu\text{mol/g}$  FW) calculated as a measure of lipid  
191 peroxidation, was determined according to Heath and Packer, (1968).

192

### 193 **Estimation of reducing sugar**

194 The amount of reducing sugar in shoots was determined using method describe by  
195 Johnson et al (1964). The sugar was extracted from 1.0 g homogenized tissue using  
196 80% ethanol at 95 °C, then centrifuged for 10 min at 14000 rpm. The resulting  
197 supernatant was dried for 2 hrs at 80 °C, before dissolving the residue in 10 ml of  
198 distilled water and 2.0 ml alkaline copper reagent was added. The mixture was heated  
199 in water bath at 100 °C for 10 min, and then cooled to room temperature. Exactly 1.0  
200 ml of Nelson's reagent was added and the volume was adjusted to 10 ml with double  
201 distilled water. Absorbance of the solution was taken at 520 nm. The amount of  
202 reducing sugar (mg /g FW) was calculated using a standard curve of glucose.

203

### 204 **Estimation of leaf total protein**

205 Total sample protein was extracted using the acetone-trichloroacetic acid (TCA)  
206 precipitation method as described by Damerval et al. (1986). In brief, 500 g of leaf  
207 tissue from each treatment was homogenized in 10% TCA in ice and incubated  
208 overnight at 4°C. The homogenate was centrifuged at 14,000 rpm for 15 min at 4°C  
209 and the pellet was washed with 100% acetone to remove any contaminating pigments.  
210 To remove phenolic compounds, the pigment-free pellet was first washed with 80%

211 ethanol, ethanol/trichloromethane (3:1 v/v), then ethanol/ethoxyethane (3:1 v/v) and  
212 finally with ethoxyethane. The washed pellet was then suspended in a volume of 0.1  
213 N sodium hydroxide for protein estimation. The sample proteins were estimated at  
214 750 nm using bovine serum albumin as standard and expressed as gram per dry  
215 weight of tissue.

216

### 217 **Measurements of Na and K and Cl content in plant tissue**

218 Mature leaves from randomly selected finger millet plants were powdered and ashed  
219 at 200 °C for 12 hrs. The ashes were dissolved in 5 ml 30% ammonia, and further  
220 diluted with deionized water (Cheng et al. 2004). Concentrations of Na<sup>+</sup> and K<sup>+</sup> ions  
221 were measured using a flame atomic absorption spectrometry. The concentration of  
222 chloride ions was determined after aqueous extraction of 1 g of the plant material in  
223 25 ml of distilled water. Concentrations of Cl<sup>-</sup> ions were determined by titration from  
224 the infiltrated solution using silver nitrate in the presence of potassium chromate as  
225 described by Eaton et al. (1995).

226

### 227 **Statistical analysis**

228 A completely randomized block design with five replications for each experiment was  
229 used and the results represent mean ± standard error. Analysis of variance (ANOVA)  
230 was performed using the Minitab statistical computer software version 17 (Minitab  
231 Inc., State College, PA, USA) and differences between means were accomplished  
232 using the Fisher's protected LSD test at a confidence level of 95% ( $p \leq 0.05$ ).  
233 Relationships between the assessed features were performed by Pearson's correlation.  
234 Principal component analysis (PCA) and Cluster analysis (CA) were carry out using  
235 the FactoMineR (Factor analysis and data mining with R) package (Husson et al.,  
236 2008).

237

### 238 **Results**

239 The present study investigated the changes growth parameters, relative water content,  
240 lipid peroxidation level, proline content, reducing sugar and total protein under NaCl  
241 induced salinity stress in six finger millet varieties. The parameters analyzed exhibited  
242 significant variations among the varieties.



243

#### 244 **Effects of salt stress on seed germination**

245 The effect of salinity stress on finger millet seeds germination, evaluated by the  
246 percentage of germinated seeds after 17 days, is as shown in Table I. Our results  
247 indicate that for all varieties, the germination rate decreased with an increase of the  
248 NaCl concentration and varied among the varieties. This decrease in germination rate  
249 was most profound at 200 mM and 300mM NaCl concentrations where 0 %  
250 germination rate were recorded for all six varieties. In contrast, at moderate stress  
251 levels (100 mM NaCl), significant differences in germination profile was observed  
252 with GBK043122 having the highest germination rate (46.25%) compared to others  
253 whose germination rates ranged from 3.75% to 22.50%. The germination percentage  
254 under control conditions was also distinct among the six finger millet varieties and  
255 ranged ranging from 90.00% for GBK043137 to 56.25% for GBK043122 (Table 1).

256

#### 257 **Growth characteristics in finger millet varieties under salt stress**

258 After phenotypic observation, chlorosis (yellowish color) was observed in all plants  
259 under salinity conditions. Leaf chlorosis (yellowish color), leaf scorch, slowed and  
260 delayed growth and enlargement of the leaves were distinctly observed in seedlings of  
261 all varieties under salinity stress. Plants growing under control conditions exhibited  
262 healthy leaves and normal shoot and root developmental stages (Figure 1). The shoot  
263 length progressively retarded with increase in NaCl concentration (Table 2).  
264 Particularly, the shoot height of GBK043128 population was significantly reduced at  
265 the end of under severe salt stress conditions (300 mM NaCl) by about 72.09% while  
266 GBK043124 had the least shoot height reduction rate at 63.33% when compared to  
267 the control plants (Table 2). Significance variations on the effect of NaCl on shoot  
268 length were only observed at 200 mM NaCl concentration. Higher salt concentrations  
269 did not record any varietal difference on shoot length (Table 2). Similarly, increasing  
270 salinity stress resulted in gradual reductions in plant root lengths in all studied  
271 varieties ranging from 20.9% for GBK043137 to 36.1% for GBK043128 compared to  
272 their respective controls (Table 3). We also observed significant differences between  
273 varieties in root length values across the salt concentrations, signifying that increased

274 salt stress adversely affected root length growth in the varieties at different degrees  
275 (Table 3).

276

### 277 **Relative water content**

278 The changes in leaves RWC along with increase in salinity stress are presented in  
279 Table 4. The leaves relative water content of all varieties under control conditions  
280 were similar ranging from 79.44 to 87.86%. Exposition to increasing salinity stress  
281 progressively reduced water potential of leaves in all varieties compared to their  
282 respective control plants leaves and they exhibited variation in their relative water  
283 content. Variety GBK043094 tolerated salinity stress better with the least reduction in  
284 relative water content under severe salinity stress (300 mM NaCl) compared to the  
285 others (Table 4).

286

### 287 **Effects of salt stress on chlorophyll content**

288 Analysis of total chlorophyll content demonstrated significant differences in  
289 photochemistry among varieties and the salt treatments (Table 5). More specifically,  
290 for all the varieties, the addition of NaCl<sub>2</sub> elicited significant decrease in chlorophyll  
291 content compared to the non-saline treatments and inverse relationship between  
292 salinity stress and total chlorophyll content in all finger millet varieties was observed.  
293 In contrast, plants grown under normal conditions maintained a relatively high levels  
294 total chlorophyll content and interestingly, they did not have similar chlorophyll  
295 content. Under saline conditions, photosynthetic pigment of varieties GBK043137  
296 and GBK043128 were found to be extremely reduced with reduction percentages of  
297 48.22% and 39.54%, respectively. However, GBK043124 retained a relatively higher  
298 chlorophyll content compared to its respective control value, under 300 mM NaCl  
299 stress conditions (Table 5). These findings signified that salinity stress may have  
300 damaged the photochemical apparatus of the plant leaves.

301

### 302 **Proline accumulation and lipid peroxidation assay**

303 Free proline content was estimated in all six finger millet varieties at early seedling  
304 growth stage to evaluated their effect under NaCl induced osmotic stress and the data  
305 is shown in Table 6. Increasing salt concentrations from 100 to 200 and 300 mM

306 NaCl application remarkably induced increased free proline content in the plants by  
307 an average of 1.7-, 2.2- and 3.0-fold change, respectively, relative to the levels in the  
308 control plants (Table 6). GBK043094 variety had the significantly highest proline  
309 content, followed by GBK043137, GBK043124 and GBK043122 while GBK043128  
310 and GBK043050 had the lowest (Table 6). In unstressed plants, proline concentration  
311 was similar. As shown in Table 7, we observed continuous increase in  
312 malondialdehyde content in leaves of all varieties tested in response to salinity stress  
313 relative to their respective controls and the magnitude of response differed among the  
314 varieties. A continuous increase in the level of lipid peroxidation was observed with  
315 increasing level of salinity in all the varieties. The malondialdehyde levels ( $\mu\text{mol/g}$   
316 FW) was elevated to 20.7%, 31.3% and 51.2% at 100, 200 and 300 mM NaCl,  
317 respectively, as compared to unstressed plants (Table 7). Malondialdehyde content  
318 was significantly elevated in GBK043050, GBK043122 GBK043124 and  
319 GBK043128 under severe salinity stress (300 mM NaCl) treatments signifying higher  
320 rates of oxidative damage and lipid peroxidation whereas GBK043094 and  
321 GBK043137 had lower levels of malondialdehyde at corresponding salinity stress  
322 (Table 7).

323

#### 324 **Reducing sugars and protein contents under NaCl stress**

325 The impact of salinity treatment triggered substantial elevation in reducing sugar  
326 amounts in the stressed plants when compared to control the experiments (Table 8).  
327 Increasing salt concentration caused an increase in reducing sugar amounts in the  
328 stressed plant shoots and highest accretion of reducing sugar was found in 100 mM  
329 NaCl stress followed by 200 mM and 300 mM NaCl treatments. However, varietal  
330 differences difference was seen and the increase was remarkably highest in  
331 GBK043094, followed by GBK043050, GBK043137 and GBK043122 while  
332 GBK043128 had the lowest amount (Table 8). Plants under control conditions had the  
333 lowest protein content ranging from 1.20 to 2.23 mg/g FW reducing whereas the  
334 highest reducing sugar content protein content of 4.47 to 6.45 mg/g FW was found in  
335 plants treated with 300 mM NaCl (Table 8). As showed in Table 9, increasing NaCl  
336 concentration had a substantial impact on the protein content of finger millet plants  
337 and the response was in a dose dependent relationship. A clear varietal difference was

338 observed and significantly higher levels of protein were found in GBK043094,  
339 GBK043050 and GBK043122 than the rest, under control and also stress conditions  
340 (Table 9).

341

#### 342 **Effect of salinity on shoot Na, K and Cl ion composition**

343 The salinity treatments, varieties and the synergy effects were significant for the  
344 concentrations of all leaf ions (Fig. 2A, Fig. 2B, Fig. 2C, Supplementary Table 1). As  
345 expected, the level of Na<sup>+</sup> and Cl<sup>-</sup> in all varieties was higher under salt stress but  
346 differed in the degree of the increase. The gradual increase of salinity stress triggered  
347 a gradual rise of both ion concentration in finger millet leaves. The average levels of  
348 Na<sup>+</sup> in leaves ranged from 5.37 to 7.82 mg/g DW for plants grown in control  
349 conditions and from 12.3 to 96.2 mg/g DW for salinity stressed plants (Fig. 2A).  
350 Under 300 mM NaCl stress treatments, the different varieties increased their Na<sup>+</sup> ion  
351 concentration from 6.8- to 13.1-fold when compared to the controls. GBK043124,  
352 GBK043137 and GBK043094 displayed statically the minimum increase of Na<sup>+</sup>  
353 under salinity stress (Fig. 2A). On the other hand, the leaf Cl<sup>-</sup> levels ranged from 2.5  
354 to 5.1 mg/g DW for finger millet plants under control conditions and from 5.0 to 17.8  
355 mg/g DW for plants under salinity stress (Fig. 4). GBK043050 had the lowest  
356 concentration of Cl<sup>-</sup> under untreated and salinity stress treatments. GBK043124 had  
357 the least (3.05-fold) increase in Cl<sup>-</sup> ion concentration under salt treatment, while  
358 GBK043094 had the largest (4.2-fold) increase ((Fig. 2C). In contrast, salinity stress  
359 induced significant reduction of K<sup>+</sup> concentration in leaves of finger millet plants  
360 irrigated with three NaCl doses ((Fig. 3). In comparison to control experiments,  
361 potassium ions concentration decreased by about 18.6, 53.3 and 72.6 % in leaves of  
362 plants grown under 100, 200 and 300 mM NaCl respectively. GBK043094 upheld the  
363 highest concentration of K<sup>+</sup> and had a 74.0% decline in K<sup>+</sup> concentration while,  
364 GBK043050 had the highest decrease in K content (78.9%) under salinity conditions  
365 (Fig. 2B). The lowest potassium ion concentration under salinity was found in  
366 GBK043128 followed by GBK043124 (Table 10). The leaf K<sup>+</sup>/Na<sup>+</sup> ratios differed  
367 among the varieties of finger millet studied, ranging from 0.05 in both GBK043094 to  
368 0.02 in GBK043050. Varieties, GBK043094 and GBK043137 presented the greatest

369  $K^+/Na^+$  ratio under salinity stress owing to low concentration of in the leaves (Fig.  
370 2D).

371

### 372 **Cluster analysis**

373 Cluster analysis using average linkage method of clustering was done to classify the  
374 varieties into homogenous groups using the physiological and biochemical traits of  
375 control and salinity stress treatments. Clustering grouped the six finger varieties into  
376 two major clusters based to their potential characteristics under control and salinity  
377 stress conditions, respectively (Fig. 2A, B, C and D). Varieties grouped into specific  
378 classes indicate the presence of greater diversity among finger millets under different  
379 salinity stresses, with varieties GBK043137 GBK043094 showing greater tolerance to  
380 salinity stress.

381

### 382 **Discussion**

383 Plants tolerance to salinity stress is a complex trait which is ascribed to a plethora of  
384 related morphological, physiological and biochemical adaptive responses and operate  
385 synergistically to lessen cell hyperosmolarity and the ensuing ion disequilibrium  
386 (Parihar et al., 2015). In this regard, screening and selection finger millet varieties  
387 tolerant to salinity stress is essential in order to understand their adaptations under  
388 saline soils and for successful production of finger millet in salinity prone areas. In  
389 this study, six finger millet varieties from different agroecological zones in Kenya  
390 were subjected to different levels of salinity stress, and our findings show tremendous  
391 variabilities occur within the tested parameters.

392

393 Seed germination and seedling emergence are fundamental biological processes in  
394 plant growth and development cycles, and therefore excellent seed germination and  
395 emergence are important for attainment of high yields and increasing concentrations  
396 of salt adversely affects germination process (Laghmouchi et al., 2017; Anuradha et  
397 al., 2001). In the present study, the germination percentage was delayed or  
398 constrained under salinity stress compared to control growth conditions. The observed  
399 decrease in germination rate under the salinity stress could be attributed to salt  
400 toxicity and changes in cellular osmotic potential. We found out that Under higher

401 high hypertonic potential, the reduction in the germination rate was less for the  
402 salinity-tolerant variety (GBK043094), compared with most salt sensitive variety  
403 (GBK043050). Our finding was in accordance to previous work in lettuce (Ahmed et  
404 al., 2019), alfalfa (Sandhu et al., 2017) and wheat (Tounsi et al., 2017) under saline  
405 conditions. In addition, a high degree of shoot growth depression in seedlings grown  
406 under salinity stress was clearly noticeable, more in the salt-sensitive varieties, which  
407 displayed reduced leaf area, leaf chlorosis, leaf burns and plant death, symptoms  
408 associated with plant toxicity. Slower growth of both shoots and roots is an adaptive  
409 characteristic for plant survival under salinity conditions because this permits the  
410 plants to commit numerous resources to mitigate the stress (Soares et al., 2018).  
411 Retarded shoot growth under salinity stress could be ascribed to the reduction in  
412 osmotic potential due to extra concentration of sodium and chloride ions in the shoot  
413 and root zone resulting to a nutritional imbalance and also due to the deviation of  
414 energy destined for growth and development to exclude sodium ions cellular  
415 absorption and biosynthesis of solutes for preservation cell turgor during hypertonic  
416 saline conditions. The observed reduction of leaf area under salinity treatments  
417 compared to control plants also suggests that salinity stress may affect plant growth  
418 through reduction in leaf area. Previous works have disclosed that salt tolerant plants  
419 displays less growth retardation and have relatively higher growth rate compared to  
420 sensitive ones under salinity stress (Carillo et al., 2019; Hussain et al., 2018; Sarabi et  
421 al., 2017; ). Consequently, our findings suggest that GBK043128 and GBK043137  
422 have a better capacity to sustain growth and development under salt treatments  
423 compared to other finger millet varieties studied, to sustain growth and production  
424 under salinity conditions (Table 2). Further, roots are often reported to play a key role  
425 in the salt tolerance of plants as they represent the first organs that control the uptake  
426 and translocation of nutrients and salts throughout the plant. Because of their direct  
427 exposure to saline environment, root growth is also vulnerable to salt stress although  
428 the extend is less than that of the shoots (Munns and Tester, 2008). The inhibition of  
429 root growth in plants adversely affects the survival and productivity of the plants and  
430 therefore, root growth under saline conditions may serve as good indicator in the first  
431 steps of screening for salinity tolerance programs. The growth of roots varies widely  
432 due to soil conditions because the status of all nutrient in plants is maintained from

433 the soil with the help of roots. Root growth rate may be severely affected by saline  
434 soils and reduction may even be recorded in salt-tolerant plants. In agreement with  
435 previously published studies on the effects of salinity on root elongation (Cirillo et al.,  
436 2019; Dugasa et al., 2019), salinity treatments were found to cause stunted root  
437 growth. The growth-promoting effect under salinity stress could be due to an increase  
438 in the osmotic potential of the cells in the elongation zone coupled with enhanced cell  
439 division. The absorbed ions at this point could be quickly compartmentalized into the  
440 vacuoles without getting to the maximum capacity, thereby increasing the turgor  
441 within the cells and stimulating cell elongation. We also observed that the effects of  
442 salinity stress on root grow was much less compared to that of the shoot. This feature  
443 could be explained by the fact that roots are less affected by salt salinity due to  
444 transport of ions to other plant organs and hence the stressed roots to maintain  
445 osmotic balance.

446

447 Accumulation of ions in plant tissues is regularly used to evaluate the capability of a  
448 plant to resist salt stress and salinity is known to cause fluctuations of macronutrients.  
449 The concentration of sodium, potassium and calcium ions and the K/Na ratio are vital  
450 features that usually used for screening of salt tolerant plants (Sarabi et al., 2017). We  
451 used leaf tissues because they are more sensitive to salt and start displaying toxicity  
452 much earlier compared to other plant organs (Munns and Tester, 2008). Our study  
453 revealed that the NaCl treatments increased the finger millet leaf  $\text{Na}^+$  and  $\text{Cl}^-$   
454 concentrations. Contrary, salinity treatments caused decrease of  $\text{K}^+$  in all varieties,  
455 probably due to membranes depolarization and loss of  $\text{Ca}^+$  ion due to the  
456 displacement by  $\text{Na}^+$  ions. It has also been established that  $\text{Na}^+$  and  $\text{K}^+$  have similar  
457 cellular effects despite the fact  $\text{Na}^+$  inhibits  $\text{K}^+$  absorption through binding and  
458 obstructing to its transport system (Flowers and Yeo, 1986). It has been established  
459 that  $\text{Na}^+$  and  $\text{K}^+$  have similar cellular effects despite the fact  $\text{Na}^+$  inhibits  $\text{K}^+$   
460 absorption through binding and obstructing to its transport system (Flowers and Yeo  
461 (1986). Many studies have reported that plants growing under high NaCl  
462 concentrations have low ratios of  $\text{K}^+/\text{Na}^+$  ratio caused by deficiency of intracellular  $\text{K}^+$   
463 (Dugasa et al., 2018; Cirillo et al., 2018; Sandhu et al., 2017; Sarabi et al., 2017). The  
464 same phenomenon was also observed in this study, where increment of NaCl

465 concentration decreased the leaf  $K^+/Na^+$  ratios. In our study, we observed a clear  
466 association between  $K^+/Na^+$  ratio and salinity tolerance and varieties, GBK043137  
467 and GBK043094 showed the highest  $K^+/Na^+$  ratios under both control and NaCl  
468 treatments, however, these varieties were placed at the highest ranking for salinity  
469 tolerance index. Usually, cellular influx of  $Cl^-$  ions influx require energy in a reaction  
470 mechanism catalysed by a  $Cl^-/2H^+$  coupled antiporters and symporters and it is  
471 typically taken up freely with water uptake, and is therefore accumulated in leaf  
472 organs depending on the transpiration rate (Munns and Tester, 2008). Like  $Na^+$ ,  $Cl^-$   
473 ions may also be sequestered in cell vacuoles. In our study, the concentration of  $Cl^-$  in  
474 leaves was higher than that of  $Na^+$  and this may be justified by the partial control of  
475  $Na^+$  at roots. Comparable results were also exhibited by melon (Sarabi et al., 2017)  
476 and cucumber (Colla et al., 2012).

477

478 Several studies suggest chlorophyll content as a biochemical marker of salt tolerance  
479 in plants (Ishikawa Shabala, 2019; Taïbi et al., 2016; Sairam et al., 2005). It is known  
480 that salt tolerant plants show increased or unchanged chlorophyll levels under salinity  
481 conditions whereas chlorophyll contents decreased in salt-sensitive plants (Stepien  
482 and Johanson, 2009; Ashraf and Harris, 2013). In general, decrease of chlorophyll  
483 content under salt stress is considered to be a result of slow synthesis or fast  
484 breakdown of the pigments in cells (Ashraf, 2003). The decrease in total chlorophyll  
485 content may also be observed due to ion accumulation and functional disorders  
486 observed during stoma opening and closing under salinity stress (Nawaz et al., 2010).  
487 Another reason for the decrease of chlorophyll content under salt conditions is stated  
488 to be the rapid maturing of leaves (Yeo et al., 1991). In our study statistically  
489 significant decrease in total chlorophyll content was observed with increasing salt  
490 concentration. Similar results were reported by Ashraf and Yousafali (1998) and Ali  
491 et al., (2004) and showed that the total chlorophyll content of rice leaves was  
492 generally reduced under high salinity. While the other varieties recorded a decrease  
493 over the control plants, variety GBK043094 recorded unchanged total chlorophyll  
494 content with increase in stress (Table4). These results showed that the reduction in  
495 chlorophyll content was variety specific and some varieties showed comparatively  
496 lesser quantum of negative variation in chlorophyll content thus indicating their



497 potential to grow and perform moderately well even under higher levels of salt stress.  
498 High salt concentration induced reduction of total chlorophyll content indicates that  
499 salt stress induces chlorophyll degradation and destruction of chloroplast structures.

500

501 All plants employ complex biochemical defensive mechanisms against oxidative  
502 injury of free radicals and ROS during abiotic stresses. Among these defence systems  
503 is the aggregation of compatible solutes such as proline, an osmoprotectant that  
504 preserves membrane integrity and mitigates oxidative burst in plant challenged by salt  
505 stress Ahmed et al. 2013, Rao et al., 2013). In addition, proline exists in all plant  
506 organs, accumulating in greater proportions compared to other amino acids in salinity  
507 stressed plants (Banu et al., 2009). Although the beneficial outcome of proline  
508 overproduction in plants during salinity stress have been explicated, the definite roles  
509 of proline accretion are still obscure (Banu et al., 2009; Verbruggen and Hermans,  
510 2008). Our study reported an increased concentration of free proline content in all six  
511 finger millet varieties with GBK043094 and GBK043137 displaying higher free  
512 proline amounts at all salinity treatments suggesting that they are comparatively more  
513 tolerant to salinity stress than the rest and which may be related to their competitive  
514 ability under saline stress against oxidative stress. Based on these results, it is worth  
515 noting that increased concentration of free proline content in finger millet plants  
516 subjected to salinity treatments corresponded to improved salinity tolerance.  
517 Degradation of polyunsaturated fatty acids in plants yields malondialdehyde (MDA) a  
518 biomarker for determining the degree of lipid peroxidation and cellular membrane  
519 (Yang et al., 2018). Results from our study reveals that MDA the content in stressed  
520 plants raised with increasing stress levels corroborate with those exhibited in other  
521 plant species like *Lycium ruthenicum* (Li et al., 2019), wheat (Dugasa et al., 2018) and  
522 *Cucumis melo* L. (Sarabi et al., 2017). Our results indicated that some varieties finger  
523 millet may tolerate saline environments than others depending on the severity of the  
524 stress, by lowering the rate of lipid peroxidation and the cell membrane damage and  
525 therefore have an efficient and effective antioxidant defence mechanism. Moreover,  
526 the strong negative correlation witnessed between MDA and shoot height ( $r = -$   
527 0.6872, Supplementary Material 1), and root length ( $r = -0.7555$ , Supplementary

528 Material 1) affirms that the NaCl stress triggered lipid peroxidation is one of the  
529 reasons for the observed stunted shoot and root growth in finger millet plants.

530

531 Contrary to other osmolytes such as proline and MDA which are present at very low  
532 amounts except when their biosynthesis is triggered by stress, compatible solutes such  
533 as reducing sugars are elements of metabolism with different cell functional roles,  
534 such as precursors of other metabolites, signalling molecules and major source of  
535 energy. Their levels are highly controlled by various systems to ensure cellular  
536 homeostasis. Reducing sugars therefore play a crucial role in plant cells osmotic  
537 adjustment during salinity stress. The higher reducing sugar levels measured plants  
538 with high salinity tolerant index clearly shows that the sugar contributes to osmotic  
539 adjustment during salt treatments thus cushioning the plants against the toxic effects  
540 of NaCl. These results are substantiated by a remarkable increase in sugar amounts in  
541 salt tolerant genotypes in pigeon pea (Awana et al., 2019), *Juncus* sp (Hassan et al.,  
542 2016) and wheat (Kerepesi and Galiba, 2000). Likewise, accumulation of protein  
543 compounds has essential part in physiological responses of plant to salinity stress.  
544 Increased production of proteins and other nitrogen containing compound may induce  
545 the biosynthesis of osmotically active organic compounds including proteins with  
546 osmoprotective capacities, thereby conferring salinity resistance (Ashraf and Harris,  
547 2004). Generally, plants exposed to NaCl stress have comparatively reduced protein  
548 levels which often results to loss of cellular turgor. Just like in our case, reduction in  
549 the content of soluble protein was observed in maize plants subjected to salinity  
550 treatments (von Alvensleben et al., 2013).

551

552 Lastly, it is imperative to note that the results of this study were conducted in a  
553 laboratory set-up (artificial conditions), which may not mirror their complex natural.  
554 However, the findings give suggestive index salinity tolerance to the studied finger  
555 millet varieties.

556

## 557 **Conclusions**

558 This study gives a deep analysis of the effect of a NaCl stress treatments on the  
559 physiological and biochemical parameters six finger millet varieties. In conclusion,

560 our results demonstrated salinity responses on the evaluated features with significant  
561 varietal differences among the plants studied and supported by observations made.  
562 From the responses of GBK043094 and GBK043137 varieties, we hypothesised that  
563 these varieties are promising genetic resources with comparative high tolerance to  
564 salinity and hence they may be utilised for further assessment for breeding programs  
565 of the crop towards enhanced salinity tolerance. Our findings give suggestive salinity  
566 tolerance index to the studied finger millet varieties and should be confirmed for in a  
567 wide range a wide range of environmental conditions and other salt types. Lastly, it is  
568 imperative to note that the results of this study were conducted in a laboratory set-up  
569 (artificial conditions), which may not mirror their complex natural environments  
570 under which the crop is grown.

571

### 572 **Acknowledgements**

573 This project was funded by The World Academy of Sciences grant (Ref. No. 17-357  
574 RG/BIO/AF/AC\_I – FR3240297745) through the generous contribution of the  
575 Swedish International Development Cooperation Agency. The authors thank the  
576 Kenyatta University and Pwani University for providing laboratory facilities. The  
577 authors gratefully acknowledge Kenya Agricultural and Livestock Research  
578 Organization, Gene Bank, for providing the finger millet seeds.

579

### 580 **Author contribution**

581 Asunta Mukami, Alex Ngetich, Wilton Mbinda designed and performed the  
582 experiments performed data analyses, Asunta Mukami, Wilton Mbinda wrote the draft  
583 manuscript., Easter Syombua and Richard Oduor revised and corrected the draft  
584 manuscript, Wilton Mbinda conceptualized the idea and design, supervised the work  
585 and made critical review of the article.

586

### 587 **References**

588 Al-Hassan M., del Pilar López-Gresa, M., Boscaiu, M., & Vicente, O. (2016). Stress  
589 tolerance mechanisms in *Juncus*: responses to salinity and drought in three *Juncus*  
590 species adapted to different natural environments. *Functional Plant Biology*.  
591 43(10):949-960. doi.org/10.1071/FP16007

- 592 Anuradha S., Rao, S. S. R. (2001). Effect of brassinosteroids on salinity stress induced  
593 inhibition of seed germination and seedling growth of rice (*Oryza sativa* L.). *Plant*  
594 *Growth Regulation*, 33(2):151-153. doi.org/10.1023/A:1017590108484
- 595 Anuradha, S., & Rao, S. S. R. (2001). Effect of brassinosteroids on salinity stress  
596 induced inhibition of seed germination and seedling growth of rice (*Oryza sativa* L.).  
597 *Plant Growth Regulation*, 33(2), 151-153.
- 598 Arnon, D. (1949). Copper enzyme in isolated chloroplast and chlorophyll expressed in  
599 terms of mg per gram. *Plant Physiology*, 24(1):1-15.  
600 <https://www.jstor.org/stable/4258165>
- 601 Ashraf M. P. J. C., & Harris P. J. C. (2004). Potential biochemical indicators of  
602 salinity tolerance in plants. *Plant science*, 166(1), 3-16.  
603 doi:10.1016/j.plantsci.2003.10.024
- 604 Awana M., Yadav K., Rani K., Gaikwad K., Praveen S., Kumar S., Singh A. (2019).  
605 Insights into Salt Stress-Induced Biochemical, Molecular and Epigenetic Regulation  
606 of Spatial Responses in Pigeonpea (*Cajanus cajan* L.). *Journal of Plant Growth*  
607 *Regulation*, 1-17. doi.org/10.1007/s00344-019-09955-4
- 608 Bates L. S., Waldren R. P., Teare I. D. (1973). Rapid determination of free proline for  
609 water-stress studies. *Plant and Soil*, 39(1):205-207. doi.org/10.1007/BF00018060
- 610 Bertazzini M., Sacchi G. A., Forlani G. (2018). A differential tolerance to mild salt  
611 stress conditions among six Italian rice genotypes does not rely on Na<sup>+</sup> exclusion  
612 from shoots. *Journal of Plant Physiology*. 226, 145-153.  
613 doi.org/10.1016/j.jplph.2018.04.011
- 614 Carillo P., Cirillo C., De Micco V., Arena, C., De Pascale S., & Roupheal, Y. (2019).  
615 Morpho-anatomical, physiological and biochemical adaptive responses to saline water  
616 of *Bougainvillea spectabilis* Willd. trained to different canopy shapes. *Agricultural*  
617 *Water Management*. 212:12-22. doi.org/10.1016/j.agwat.2018.08.037
- 618 Cheng W., Zhang G., Yao H., Dominy P., Wu W., Wang, R. (2004). Possibility of  
619 predicting heavy-metal contents in rice grains based on DTPA-extracted levels in soil.  
620 *Communications in soil science and plant analysis*, 35(19-20):2731-2745.  
621 doi.org/10.1081/CSS-200036424
- 622 Chivenge P., Mabhaudhi T., Modi A., Mafongoya P. (2015). The potential role of  
623 neglected and underutilised crop species as future crops under water scarce conditions

624 in Sub-Saharan Africa. *International Journal of Environmental Research and Public*  
625 *Health*. 12(6):5685-5711. doi.org/10.3390/ijerph120605685

626 Cirillo C., Rouphael Y., Caputo R., Raimondi G., Sifola M. I., De Pascale S. (2016).  
627 Effects of high salinity and the exogenous application of an osmolyte on growth,  
628 photosynthesis, and mineral composition in two ornamental shrubs. *The Journal of*  
629 *Horticultural Science and Biotechnology*. 91(1), 14-22.  
630 doi.org/10.1080/14620316.2015.1110988

631 Damerval C, de Vienne D, Zivy M, Thiellement H (1986). Technical improvements in  
632 two-dimensional electrophoresis increase the level of genetic variation detected in  
633 wheat-seedling proteins. *Electrophoresis* 7(1):52–54.  
634 doi.org/10.1002/elps.1150070108

635 Eaton A.D., Clesceri, L.S. Greenberg, A.E. (1995). *Standard Methods for the*  
636 *Examination of Water and Wastewater*, 19th edition. American Public Health  
637 Association, Washington, USA.

638 de Freitas P. A. F., de Souza M. R., Marques, E. C., Prisco, J. T., Gomes-Filho, E.  
639 (2018). Salt tolerance induced by exogenous proline in maize is related to low  
640 oxidative damage and favorable ionic homeostasis. *Journal of Plant Growth*  
641 *Regulation*, 37(3):911-924. doi.org/10.1007/s00344-018-9787-x

642 Dugasa M. T., Cao F., Ibrahim W., Wu F. (2019). Differences in physiological and  
643 biochemical characteristics in response to single and combined drought and salinity  
644 stresses between wheat genotypes differing in salt tolerance. *Physiologia Plantarum*.  
645 165: 134–143. doi:10.1111/ppl.12743

646 Filichkin S. A., Ansariola M., Fraser V. N., Megraw M. (2018). Identification of  
647 transcription factors from NF-Y, NAC, and SPL families responding to osmotic stress  
648 in multiple tomato varieties. *Plant Science*, 274, 441-450.  
649 doi.org/10.1016/j.plantsci.2018.06.021

650 Flowers T. J., & Yeo A. R. (1986). Ion relations of plants under drought and salinity.  
651 *Functional Plant Biology*, 13(1):75-91. doi.org/10.1071/PP9860075

652 Heath R. L., Packer L. (1968). Photoperoxidation in isolated chloroplasts: I. Kinetics  
653 and stoichiometry of fatty acid peroxidation. *Archives of biochemistry and*  
654 *biophysics*, 125(1):189-198. doi.org/10.1016/0003-9861(68)90654-1

- 655 Hema R., Vemanna R. S., Sreeramulu S., Reddy C. P., Senthil K. M., Udayakumar M.  
656 (2014). Stable expression of mtID gene imparts multiple stress tolerance in finger  
657 millet. PLoS One, 9(6), e99110. doi.org/10.1371/journal.pone.0099110
- 658 Hussain M. I., Al-Dakheel A. J., & Reigosa M. J. (2018). Genotypic differences in  
659 agro-physiological, biochemical and isotopic responses to salinity stress in quinoa  
660 (*Chenopodium quinoa* Willd.) plants: Prospects for salinity tolerance and yield  
661 stability. Plant Physiology and Biochemistry. 129:411-420.  
662 /doi.org/10.1016/j.plaphy.2018.06.023
- 663 Ibrahim, E. A. (2016). Seed priming to alleviate salinity stress in germinating seeds.  
664 Journal of Plant Physiology, 192, 38-46. doi.org/10.1016/j.jplph.2015.12.011
- 665 Ishikawa, T., & Shabala, S. (2019). Control of xylem Na<sup>+</sup> loading and transport to the  
666 shoot in rice and barley as a determinant of differential salinity stress tolerance.  
667 Physiologia Plantarum. 165(3):619-631. doi.org/10.1111/ppl.12758
- 668 Johnson, G., Lambert, C., Johnson, D. K. D., & Sunderwirth, S. G. (1964).  
669 Colorimetric determination of glucose, fructose, and sucrose in plant materials using a  
670 combination of enzymatic and chemical methods. Journal of Agricultural and Food  
671 Chemistry, 12, 216-219. doi: 10.1021/jf60133a007
- 672 Kerepesi I., & Galiba G. (2000). Osmotic and salt stress-induced alteration in soluble  
673 carbohydrate content in wheat seedlings. Crop Science. 40(2):482-487.  
674 doi:10.2135/cropsci2000.402482x
- 675 Kumar V., Khare T. (2016). Differential growth and yield responses of salt-tolerant  
676 and susceptible rice cultivars to individual (Na<sup>+</sup> and Cl<sup>-</sup>) and additive stress effects of  
677 NaCl. Acta Physiologiae Plantarum. 38(170):1-9. doi: 10.1007/s11738-016-2191-x
- 678 Laghmouchi Y., Belmehdi O., Bouyahya A., Senhaji N. S., & Abrini J. (2017). Effect  
679 of temperature, salt stress and pH on seed germination of medicinal plant *Origanum*  
680 *compactum*. Biocatalysis and Agricultural Biotechnology. 10:156-160.  
681 doi.org/10.1016/j.bcab.2017.03.002
- 682 Li Y., Zhang T., Zhang Z., He K. (2019). The physiological and biochemical  
683 photosynthetic properties of *Lycium ruthenicum* Murr in response to salinity and  
684 drought. Scientia Horticulturae. 256(108530):1-9.  
685 doi.org/10.1016/j.scienta.2019.05.057

- 686 Munns R., James R. A., Läuchli, A. (2006). Approaches to increasing the salt  
687 tolerance of wheat and other cereals. *Journal of Experimental Botany*, 57(5):1025-  
688 1043. doi.org/10.1093/jxb/erj100
- 689 Munns, R., & Tester, M. (2008). Mechanisms of salinity tolerance. *Annu. Rev. Plant*  
690 *Biol.*, 59, 651-681.
- 691 Parihar, P., Singh, S., Singh, R., Singh, V. P., & Prasad, S. M. (2015). Effect of  
692 salinity stress on plants and its tolerance strategies: a review. *Environmental Science*  
693 *and Pollution Research*, 22(6), 4056-4075. doi: 10.1007/s11356-014-3739-1
- 694 Qadir M., Quillérou E., Nangia V, Murtaza G., Singh M., Thomas R. J., Drechsel P.,  
695 Noble A. D. Economics of salt-induced land degradation and restoration. *Natural*  
696 *Resources Forum*. 38(4): 282-295. doi: 10.1111/1477-8947.12054
- 697 Rouphael, Y., Cardarelli, M., Rea, E., & Colla, G. (2012). Improving melon and  
698 cucumber photosynthetic activity, mineral composition, and growth performance  
699 under salinity stress by grafting onto Cucurbita hybrid rootstocks. *Photosynthetica*,  
700 50(2):180-188. doi.org/10.1007/s11099-012-0002-1
- 701 Sairam R. K., Srivastava G. C., Agarwal S., & Meena R. C. (2005). Differences in  
702 antioxidant activity in response to salinity stress in tolerant and susceptible wheat  
703 genotypes. *Biologia Plantarum*, 49(1): 85-91. doi.org/10.1007/s10535-005-5091-2
- 704 Sandhu D., Cornacchione M. V., Ferreira J. F., Suarez, D. L. (2017). Variable salinity  
705 responses of 12 alfalfa genotypes and comparative expression analyses of salt-  
706 response genes. *Scientific Reports*, 7(42958):1-18. doi: 10.1038/srep42958
- 707 Sarabi B., Bolandnazar S., Ghaderi N., Ghashghaie J. (2017). Genotypic differences  
708 in physiological and biochemical responses to salinity stress in melon (*Cucumis melo*  
709 L.) plants: Prospects for selection of salt tolerant landraces. *Plant Physiology and*  
710 *Biochemistry*, 119, 294-311. doi.org/10.1016/j.plaphy.2017.09.006
- 711 Shabala S., Hariadi Y., Jacobsen S. E. (2013). Genotypic difference in salinity  
712 tolerance in quinoa is determined by differential control of xylem Na<sup>+</sup> loading and  
713 stomatal density. *Journal of Plant Physiology*. 170(10):906-914.  
714 doi.org/10.1016/j.jplph.2013.01.014
- 715 Shabala, S. (2013). Learning from halophytes: physiological basis and strategies to  
716 improve abiotic stress tolerance in crops. *Annals of botany*. 112(7):1209-1221.  
717 doi.org/10.1093/aob/mct205

- 718 Soares A. C., Geilfus C. M., & Carpentier S. C. (2018). Genotype-specific growth and  
719 proteomic responses of maize towards salt stress. *Frontiers in plant science*, 9(661):1-  
720 15. doi.org/10.3389/fpls.2018.00661
- 721 Taïbi K., Taïbi F., Abderrahim L. A., Ennajah A., Belkhodja M., & Mulet, J. M.  
722 (2016). Effect of salt stress on growth, chlorophyll content, lipid peroxidation and  
723 antioxidant defence systems in *Phaseolus vulgaris* L. *South African Journal of*  
724 *Botany*, 105: 306-312. doi.org/10.1016/j.sajb.2016.03.011
- 725 Tedeschi A., Lavini A., Riccardi M., Pulvento, C., d'Andria, R. (2011). Melon crops  
726 (*Cucumis melo* L., cv. Tendral) grown in a mediterranean environment under saline-  
727 sodic conditions: Part I. Yield and quality. *Agricultural water management*.  
728 98(9):1329-1338. doi.org/10.1016/j.agwat.2011.04.007
- 729 Tlig T., Gorai M., Neffati M. (2008). Germination responses of *Diploaxis harra* to  
730 temperature and salinity. *Flora-Morphology, Distribution, Functional Ecology of*  
731 *Plants*, 203(5), 421-428. doi.org/10.1016/j.flora.2007.07.002
- 732 Tounsi S., Feki K., Hmidi D., Masmoudi K., Brini F. (2017). Salt stress reveals  
733 differential physiological, biochemical and molecular responses in *T. monococcum*  
734 and *T. durum* wheat genotypes. *Physiology and molecular biology of plants*,  
735 23(3):517-528. doi.org/10.1007
- 736 von Alvensleben N., Stookey K., Magnusson M., & Heimann, K. (2013). Salinity  
737 tolerance of *Picochlorum atomus* and the use of salinity for contamination control by  
738 the freshwater cyanobacterium *Pseudanabaena limnetica*. *PloS ONE*, 8(5): e6356.  
739 doi.org/10.1371/journal.pone.0063569
- 740 Yang C., Shahidi F., & Tsao R. (2018). Biomarkers of oxidative stress and  
741 cellular-based assays of indirect antioxidant measurement. *Measurement of*  
742 *Antioxidant Activity & Capacity*. 165-186. doi.org/10.1002/9781119135388.ch9
- 743 Zhang H. J., Zhang N. A., Yang R. C., Wang L., Sun Q. Q., Li, D. B., Cao Y.Y,  
744 Weeda S, Zhao B, Ren S, Guo Y. D. (2014). Melatonin promotes seed germination  
745 under high salinity by regulating antioxidant systems, ABA and GA 4 interaction in  
746 cucumber (*C sativus* L.). *Journal of Pineal Research*, 57(3):269-279.  
747 doi.org/10.1111/jpi.12167
- 748 Zhu J. K. (2003). Regulation of ion homeostasis under salt stress. *Current Opinion in*  
749 *Plant Biology*. 6(5):441-445. doi.org/10.1016/S1369-5266(03)00085-2





751 **Figures**

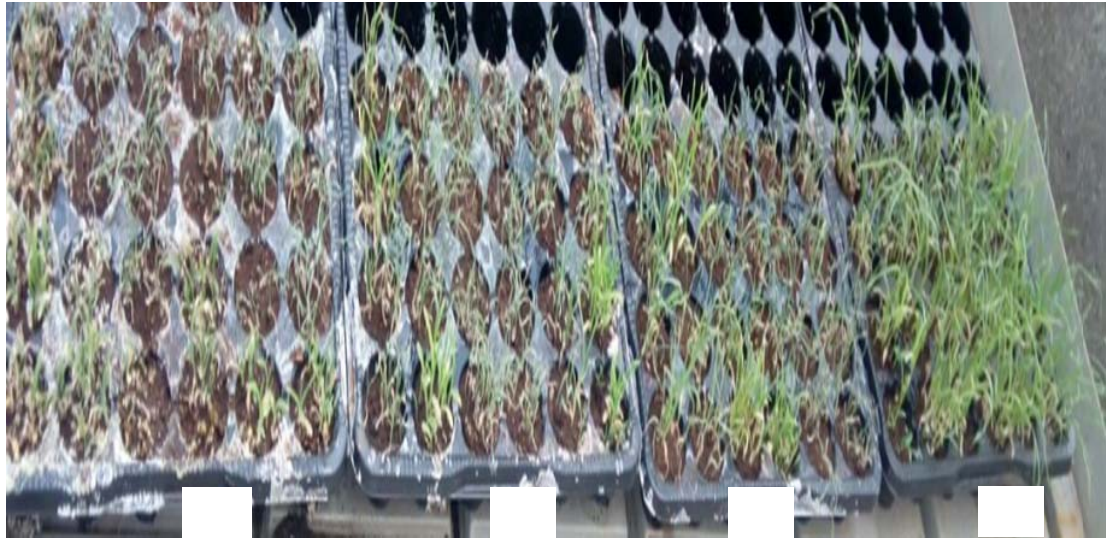

752

753 Fig. 1. Effect of salinity stress on growth of finger millet. (A) seedling growth on 300  
754 mM NaCl. (B) seedling growth on 200mM NaCl (C) seedling growth on 100 mM  
755 NaCl; (D) seedling growth on 0 mM NaCl.

756

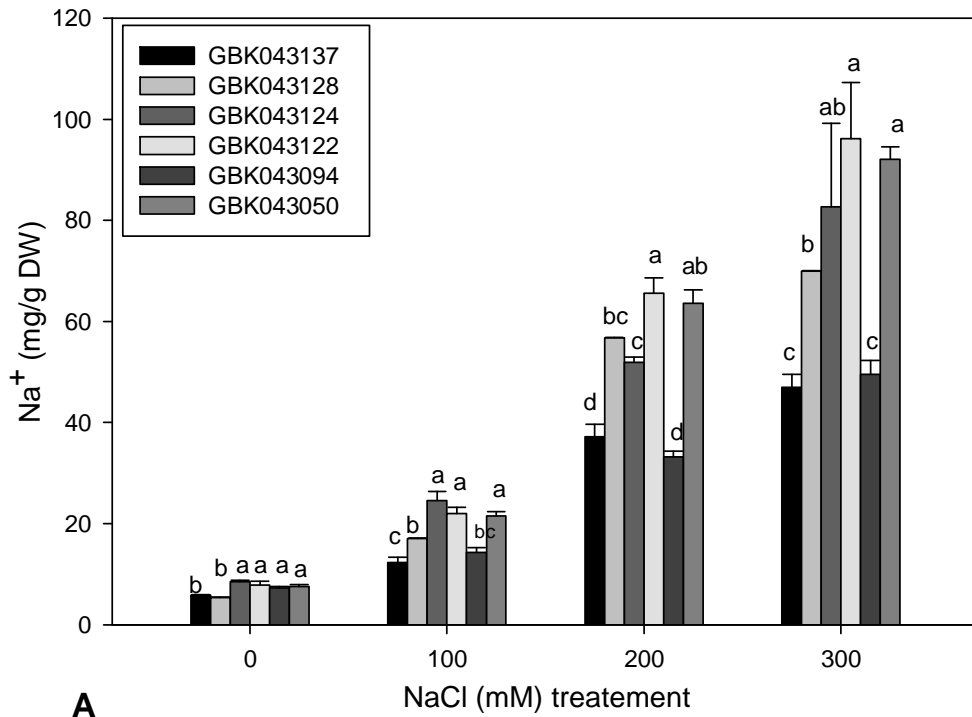

757

758

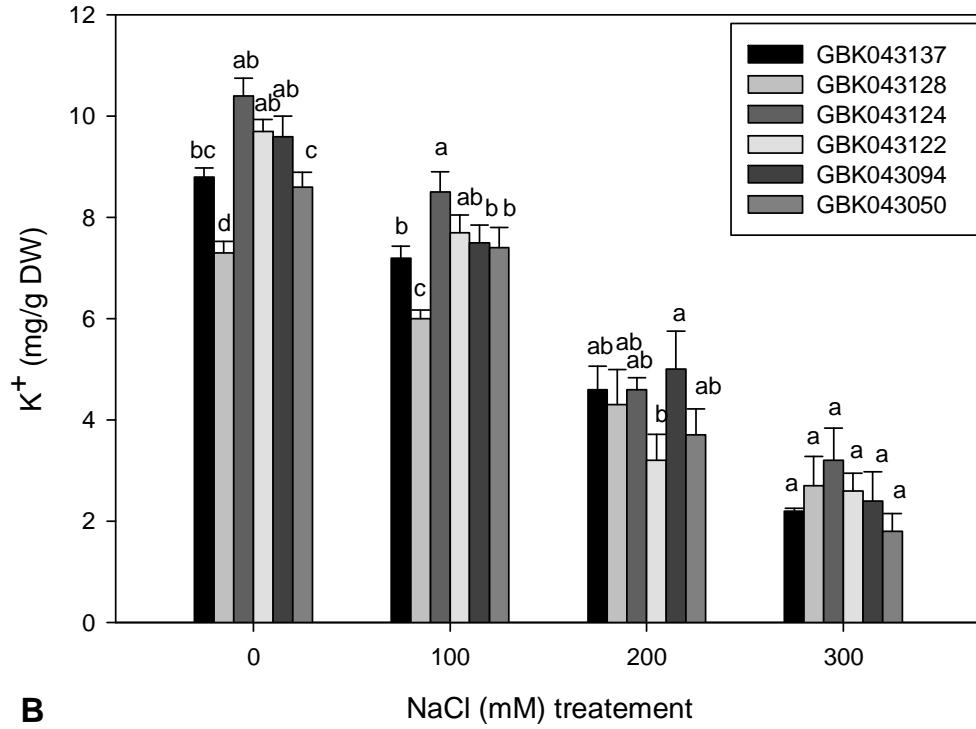

759

760

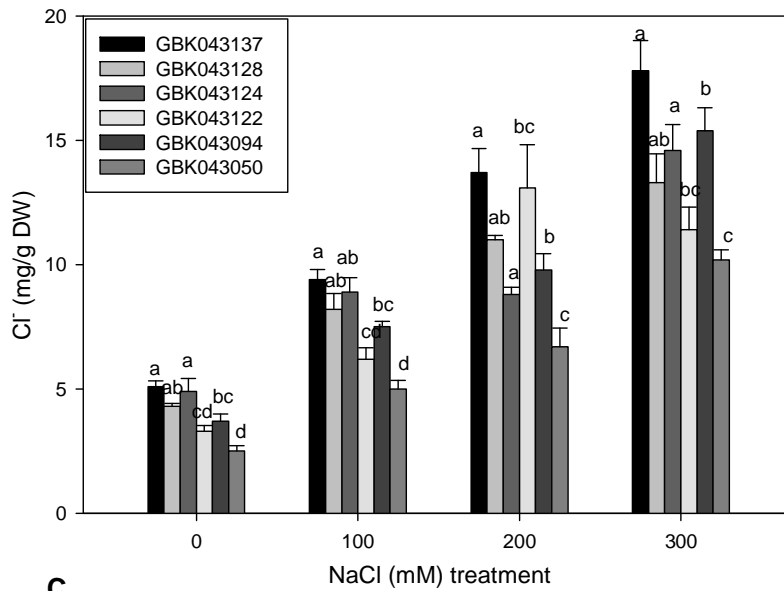

761

762

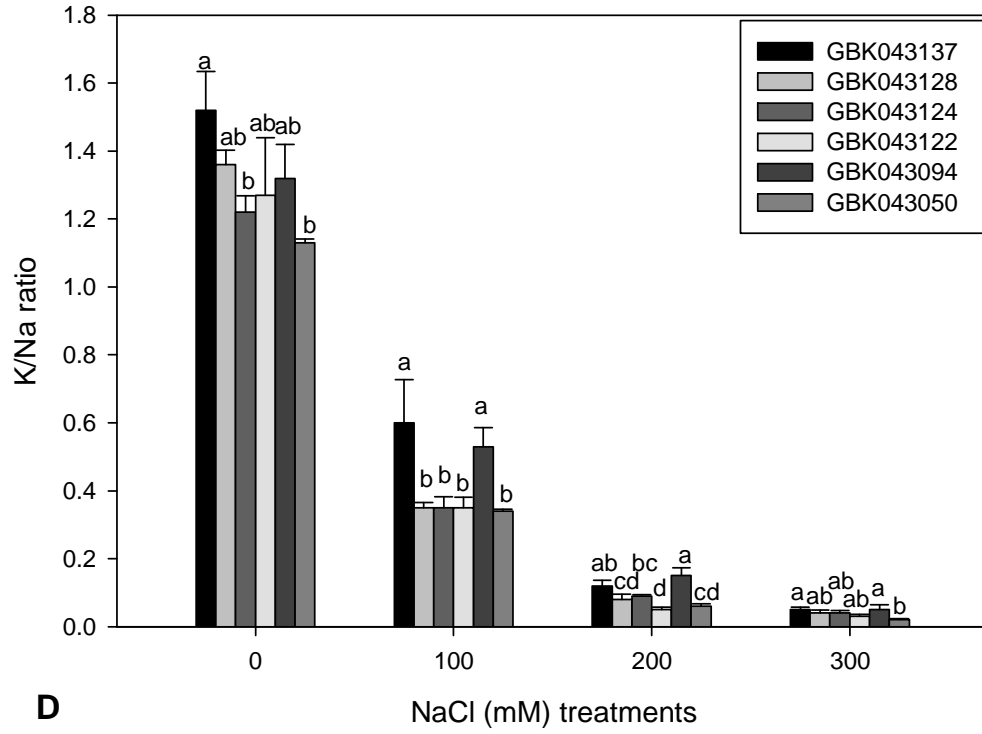

763

764 **Fig. 2. Effect of salinity stress on ion concentration of finger millet under salinity**  
765 **stress. A: Na<sup>+</sup> concentration, B K<sup>+</sup> concentration, C Cl<sup>-</sup> concentration, D K<sup>+</sup>/Na<sup>+</sup>**  
766 **ratio**

767

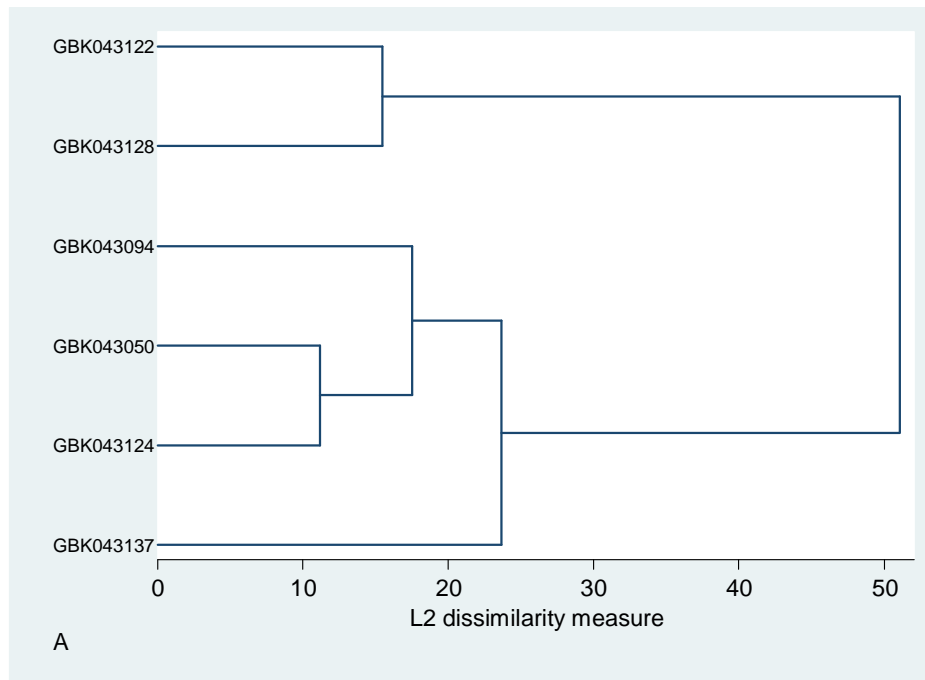

768

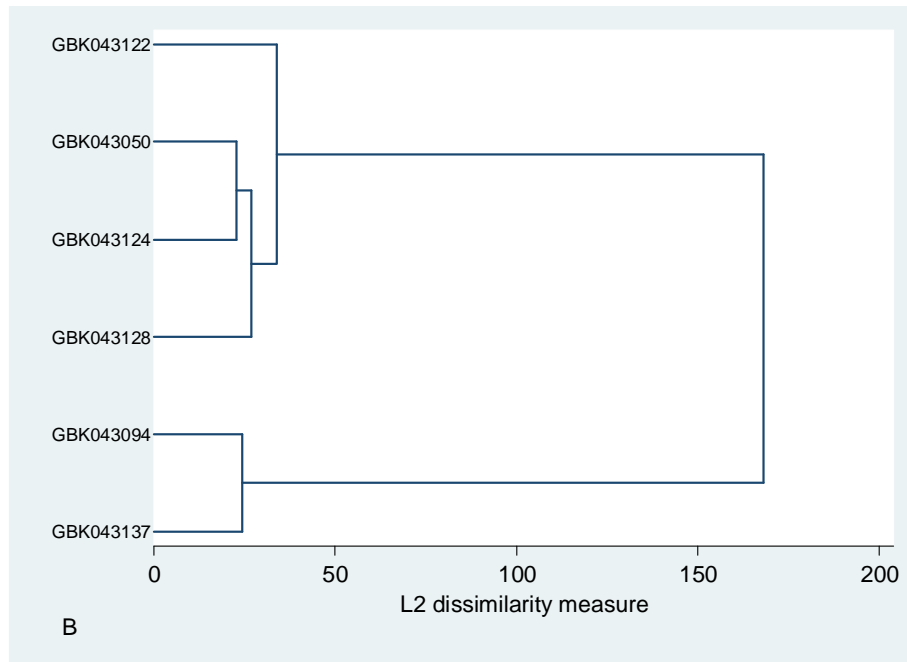

769  
770

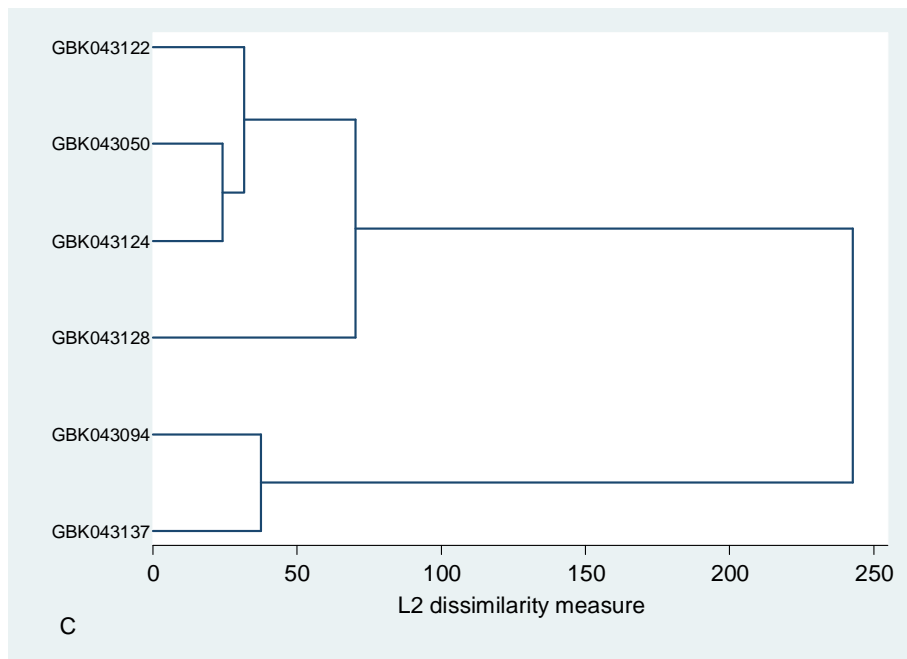

771  
772

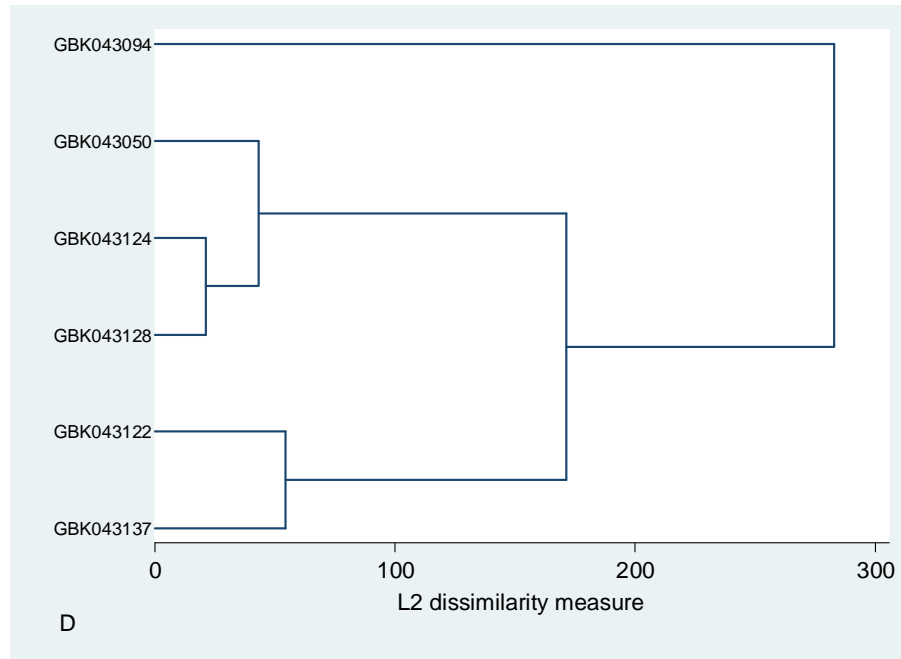

773

774

775

776

**Fig. 2.** Dendrogram of the studied finger millet varieties, obtained by cluster analysis based on their physiological and biochemical characteristics under salinity stress.

777 **Tables**

778 **Table1. Effects of NaCl on germination rate of six finger millet varieties**

| Variety   | Germination rate (%)   |                         |                      |                      |
|-----------|------------------------|-------------------------|----------------------|----------------------|
|           | 0 mM                   | 100 mM                  | 200 mM               | 300 mM               |
| GBK043137 | 90.0±3.5 <sup>a</sup>  | 3.8±3.8 <sup>c</sup>    | 0.0±0.0 <sup>a</sup> | 0.0±0.0 <sup>a</sup> |
| GBK043128 | 65.0±3.5 <sup>bc</sup> | 18.8±2.4 <sup>bc</sup>  | 0.0±0.0 <sup>a</sup> | 0.0±0.0 <sup>a</sup> |
| GBK043124 | 80.0±8.4 <sup>a</sup>  | 37.5±7.8 <sup>ab</sup>  | 0.0±0.0 <sup>a</sup> | 0.0±0.0 <sup>a</sup> |
| GBK043122 | 56.3±5.2 <sup>c</sup>  | 46.3±9.7 <sup>a</sup>   | 0.0±0.0 <sup>a</sup> | 0.0±0.0 <sup>a</sup> |
| GBK043094 | 63.8±1.3 <sup>bc</sup> | 22.5±11.6 <sup>bc</sup> | 0.0±0.0 <sup>a</sup> | 0.0±0.0 <sup>a</sup> |
| GBK043050 | 76.3±3.7 <sup>ab</sup> | 18.85±5.5 <sup>bc</sup> | 0.0±0.0 <sup>a</sup> | 0.0±0.0 <sup>a</sup> |

779 Values within a column marked with different superscript in each column differ  
 780 significantly at  $p < 0.05$  [Fishers LSD]. Each value represented as mean  $\pm$  SD are the  
 781 mean of three replications.

782

783 **Table2. Effect of NaCl on growth of finger millet**

| Variety   | Seedlings shoot length (cm) under NaCl stress |                       |                       |                      |
|-----------|-----------------------------------------------|-----------------------|-----------------------|----------------------|
|           | 0 mM                                          | 100 mM                | 200 mM                | 300 mM               |
| GBK043137 | 3.8±0.4 <sup>ab</sup>                         | 2.5±0.3 <sup>a</sup>  | 1.6±0.2 <sup>ab</sup> | 1.2±0.1 <sup>a</sup> |
| GBK043128 | 4.3±0.2 <sup>a</sup>                          | 2.6±0.4 <sup>a</sup>  | 1.9±0.2 <sup>a</sup>  | 1.2±0.2 <sup>a</sup> |
| GBK043124 | 3.0±0.3 <sup>b</sup>                          | 2.4±0.2 <sup>ab</sup> | 1.6±0.3 <sup>ab</sup> | 1.1±0.1 <sup>a</sup> |
| GBK043122 | 3.2±0.4 <sup>b</sup>                          | 2.5±0.2 <sup>a</sup>  | 1.2±0.2 <sup>bc</sup> | 1.0±0.0 <sup>a</sup> |
| GBK043094 | 3.1±0.3 <sup>b</sup>                          | 2.3±0.2 <sup>ab</sup> | 1.0±0.0 <sup>c</sup>  | 1.1±0.1 <sup>a</sup> |
| GBK043050 | 3.1±0.2 <sup>b</sup>                          | 1.7±0.1 <sup>b</sup>  | 1.3±0.2 <sup>bc</sup> | 1.1±0.1 <sup>a</sup> |

784 Values within a column marked with different superscript in each column differ  
 785 significantly at  $p < 0.05$  [Fishers LSD]. Each value represented as mean  $\pm$  SD are the  
 786 mean of three replications.

787

788 **Table 3. Effect of NaCl on growth root growth**

| Variety   | Seedlings root length (cm) under NaCl stress |                       |                      |                        |
|-----------|----------------------------------------------|-----------------------|----------------------|------------------------|
|           | 0 mM                                         | 100 mM                | 200 mM               | 300 mM                 |
| GBK043137 | 6.8±0.4 <sup>b</sup>                         | 6.4±0.4 <sup>ab</sup> | 5.9±0.2 <sup>a</sup> | 5.4±0.2 <sup>a</sup>   |
| GBK043128 | 8.0±0.4 <sup>a</sup>                         | 7.2±0.4 <sup>a</sup>  | 5.9±0.3 <sup>a</sup> | 5.1±0.3 <sup>ab</sup>  |
| GBK043124 | 6.9±0.6 <sup>b</sup>                         | 6.3±0.6 <sup>ab</sup> | 5.6±0.4 <sup>a</sup> | 5.0±0.46 <sup>ab</sup> |
| GBK043122 | 6.7±0.2 <sup>b</sup>                         | 6.2±0.5 <sup>b</sup>  | 5.5±0.3 <sup>a</sup> | 4.9±0.2 <sup>ab</sup>  |
| GBK043094 | 6.8±0.5 <sup>b</sup>                         | 6.2±0.7 <sup>b</sup>  | 5.9±0.4 <sup>a</sup> | 5.4±0.4 <sup>a</sup>   |
| GBK043050 | 7.1±0.4 <sup>b</sup>                         | 6.4±0.5 <sup>ab</sup> | 5.6±0.2 <sup>a</sup> | 4.8±0.3 <sup>b</sup>   |

789 Values within a column marked with different superscript in each column differ  
 790 significantly at  $p < 0.05$  [Fishers LSD]. Each value represented as mean  $\pm$  SD are the  
 791 mean of three replications.

792

793 **Table 4. Effect of NaCl on relative water content**

| Variety   | Seedlings relative water content (%) under NaCl stress |                         |                       |                       |
|-----------|--------------------------------------------------------|-------------------------|-----------------------|-----------------------|
|           | 0 mM                                                   | 100 mM                  | 200 mM                | 300 mM                |
| GBK043137 | 85.3±4.1 <sup>a</sup>                                  | 71.5±4.1 <sup>a</sup>   | 35.0±3.9 <sup>a</sup> | 37.1±3.3 <sup>b</sup> |
| GBK043128 | 87.9±5.3 <sup>a</sup>                                  | 71.5±4.1 <sup>abc</sup> | 35.0±3.9 <sup>b</sup> | 26.8±2.3 <sup>c</sup> |
| GBK043124 | 84.8±4.9 <sup>a</sup>                                  | 67.2±3.4 <sup>bc</sup>  | 34.2±5.0 <sup>b</sup> | 28.2±2.6 <sup>c</sup> |

|           |                       |                        |                       |                       |
|-----------|-----------------------|------------------------|-----------------------|-----------------------|
| GBK043122 | 83.0±1.8 <sup>a</sup> | 68.0±1.9 <sup>bc</sup> | 33.7±3.3 <sup>b</sup> | 46.7±9.2 <sup>c</sup> |
| GBK043094 | 82.1±6.7 <sup>a</sup> | 72.3±3.7 <sup>ab</sup> | 51.3±6.1 <sup>a</sup> | 46.7±9.2 <sup>a</sup> |
| GBK043050 | 79.4±4.6 <sup>a</sup> | 65.4±4.8 <sup>c</sup>  | 33.2±4.5 <sup>b</sup> | 27.6±3.7 <sup>c</sup> |

794 Values within a column marked with different superscript in each column differ  
795 significantly at  $p < 0.05$  [Fishers LSD]. Each value represented as mean  $\pm$  SD are the  
796 mean of three replications.

797

798 **Table 5. Effect of salinity stress on total chlorophyll content of finger millet**  
799 **varieties**

| Variety   | Seedlings chlorophyll content (mg/g FW) under NaCl stress |                      |                      |                      |
|-----------|-----------------------------------------------------------|----------------------|----------------------|----------------------|
|           | 0 mM                                                      | 100 mM               | 200 mM               | 300 mM               |
| GBK043137 | 8.4±0.4 <sup>a</sup>                                      | 8.1±1.8 <sup>a</sup> | 5.0±0.4 <sup>a</sup> | 4.4±0.6 <sup>a</sup> |
| GBK043128 | 9.1±1.0 <sup>b</sup>                                      | 7.5±1.5 <sup>b</sup> | 6.4±0.5 <sup>b</sup> | 5.5±0.1 <sup>b</sup> |
| GBK043124 | 5.9±0.1 <sup>c</sup>                                      | 6.8±0.1 <sup>c</sup> | 7.3±0.2 <sup>c</sup> | 5.5±0.1 <sup>c</sup> |
| GBK043122 | 7.3±1.9 <sup>d</sup>                                      | 5.9±0.1 <sup>d</sup> | 6.1±1.0 <sup>d</sup> | 5.8±0.7 <sup>d</sup> |
| GBK043094 | 6.2±0.5 <sup>e</sup>                                      | 5.0±0.9              | 5.0±0.8 <sup>e</sup> | 4.7±1.4 <sup>e</sup> |
| GBK043050 | 5.1±1.6 <sup>f</sup>                                      | 4.0±0.9 <sup>f</sup> | 5.0±0.4 <sup>f</sup> | 3.9±0.7 <sup>f</sup> |

800 Values within a column marked with different superscript in each column differ  
801 significantly at  $p < 0.05$  [Fishers LSD]. Each value represented as mean  $\pm$  SD are the  
802 mean of three replications.

803

804 **Table 6. Effect of salinity stress on free proline content of finger millet varieties**

| Variety   | Proline content ( $\mu$ g/g FW) under NaCl stress |                         |                          |                          |
|-----------|---------------------------------------------------|-------------------------|--------------------------|--------------------------|
|           | 0 mM                                              | 100 mM                  | 200 mM                   | 300 mM                   |
| GBK043137 | 200.9±2.4 <sup>a</sup>                            | 411.9±13.4 <sup>a</sup> | 529.3±3.0 <sup>ab</sup>  | 655.2±28.6 <sup>b</sup>  |
| GBK043128 | 224.3±3.6 <sup>a</sup>                            | 340.3±33.9 <sup>b</sup> | 471.3±63.7 <sup>bc</sup> | 571.3±37.1 <sup>c</sup>  |
| GBK043124 | 208.4±30.6 <sup>a</sup>                           | 322.4±34.0 <sup>b</sup> | 417.9±50.6 <sup>c</sup>  | 585.1±86.6 <sup>bc</sup> |
| GBK043122 | 234.5±16.2 <sup>a</sup>                           | 344.0±18.2 <sup>b</sup> | 433.2±12.3 <sup>c</sup>  | 666.7±2.1 <sup>b</sup>   |
| GBK043094 | 208.2±14.4 <sup>a</sup>                           | 401.6±25.7 <sup>a</sup> | 558.0±12.9 <sup>a</sup>  | 801.9±22.8 <sup>a</sup>  |
| GBK043050 | 212.8±21.6 <sup>a</sup>                           | 319.7±7.5 <sup>b</sup>  | 404.4±34.9 <sup>c</sup>  | 560.5±53.4 <sup>c</sup>  |

805 Values within a column marked with different superscript in each column differ  
806 significantly at  $p < 0.05$  [Fishers LSD]. Each value represented as mean  $\pm$  SD are the  
807 mean of three replications.

808

809 **Table 7. Effect of salinity stress on free proline content of finger millet varieties**

| Variety   | Malondialdehyde content ( $\mu$ g/g FW) under NaCl stress |                       |                       |                      |
|-----------|-----------------------------------------------------------|-----------------------|-----------------------|----------------------|
|           | 0 mM                                                      | 100 mM                | 200 mM                | 300 mM               |
| GBK043137 | 1.94±0.1 <sup>a</sup>                                     | 2.2±0.3 <sup>b</sup>  | 2.4±0.5 <sup>b</sup>  | 2.7±0.4 <sup>b</sup> |
| GBK043128 | 2.21±0.3 <sup>a</sup>                                     | 2.9±0.2 <sup>ab</sup> | 2.9±0.4 <sup>ab</sup> | 3.6±0.2 <sup>a</sup> |
| GBK043124 | 2.67±0.4 <sup>a</sup>                                     | 3.3±0.3 <sup>a</sup>  | 3.4±0.5 <sup>a</sup>  | 3.7±0.6 <sup>a</sup> |
| GBK043122 | 2.22±0.4 <sup>a</sup>                                     | 2.8±0.2 <sup>ab</sup> | 3.3±0.1 <sup>a</sup>  | 3.8±0.4 <sup>a</sup> |
| GBK043094 | 1.96±0.2 <sup>a</sup>                                     | 2.3±0.3 <sup>b</sup>  | 2.47±0.2 <sup>b</sup> | 2.8±0.3 <sup>b</sup> |
| GBK043050 | 2.19±0.8 <sup>a</sup>                                     | 2.5±0.9 <sup>b</sup>  | 3.0±0.7 <sup>ab</sup> | 3.9±0.5 <sup>a</sup> |

810 Values within a column marked with different superscript in each column differ  
811 significantly at  $p < 0.05$  [Fishers LSD]. Each value represented as mean  $\pm$  SD are the  
812 mean of three replications.



813 **Table 8. Effect of salt stress on reducing sugars on finger millet**

| Variety   | Reducing sugars content (mg/g FW) under NaCl stress |                       |                       |                       |
|-----------|-----------------------------------------------------|-----------------------|-----------------------|-----------------------|
|           | 0 mM                                                | 100 mM                | 200 mM                | 300 mM                |
| GBK043137 | 1.6±0.4 <sup>bc</sup>                               | 2.1±0.6 <sup>ab</sup> | 4.0±0.8 <sup>bc</sup> | 4.9±0.9 <sup>bc</sup> |
| GBK043128 | 1.2±0.3 <sup>c</sup>                                | 1.6±0.3 <sup>b</sup>  | 3.7±0.7 <sup>bc</sup> | 4.6±0.8 <sup>c</sup>  |
| GBK043124 | 1.3±0.3 <sup>c</sup>                                | 1.7±0.3 <sup>b</sup>  | 3.3±0.5 <sup>c</sup>  | 4.7±0.3 <sup>c</sup>  |
| GBK043122 | 1.8±0.4 <sup>abc</sup>                              | 2.1±0.4 <sup>ab</sup> | 3.7±0.5 <sup>bc</sup> | 5.5±0.2 <sup>bc</sup> |
| GBK043094 | 2.2±0.3 <sup>a</sup>                                | 2.7±0.2 <sup>a</sup>  | 5.0±0.0 <sup>a</sup>  | 6.5±0.5 <sup>a</sup>  |
| GBK043050 | 2.1±0.4 <sup>ab</sup>                               | 2.5±0.4 <sup>a</sup>  | 4.4±0.3 <sup>ab</sup> | 5.8±0.4 <sup>ab</sup> |

814 Values within a column marked with different superscript in each column differ  
815 significantly different at  $p < 0.05$  [Fishers LSD]. Each value represented as mean  $\pm$   
816 SD are the mean of three replications.

817

818 **Table 9 Effect of salt stress on total protein on finger millet**

| Variety   | Total protein content (mg BSA/g FW) under NaCl stress |                       |                         |                        |
|-----------|-------------------------------------------------------|-----------------------|-------------------------|------------------------|
|           | 0 mM                                                  | 100 mM                | 200 mM                  | 300 mM                 |
| GBK043137 | 15.2±1.3 <sup>b</sup>                                 | 34.4±1.6 <sup>b</sup> | 73.8±7.3 <sup>c</sup>   | 95.7±9.8 <sup>b</sup>  |
| GBK043128 | 15.3±2.1 <sup>b</sup>                                 | 33.9±3.0 <sup>b</sup> | 73.1±7.4 <sup>c</sup>   | 94.7±8.0 <sup>b</sup>  |
| GBK043124 | 13.2±1.9 <sup>b</sup>                                 | 32.1±3.1 <sup>b</sup> | 74.7±7.1 <sup>bc</sup>  | 85.6±4.1 <sup>b</sup>  |
| GBK043122 | 20.0±2.2 <sup>a</sup>                                 | 42.5±5.2 <sup>a</sup> | 95.9±4.1 <sup>a</sup>   | 111.9±7.4 <sup>a</sup> |
| GBK043094 | 20.5±3.0 <sup>a</sup>                                 | 45.1±5.7 <sup>a</sup> | 90.5±9.7 <sup>a</sup>   | 119.2±6.5 <sup>a</sup> |
| GBK043050 | 20.4±1.2 <sup>a</sup>                                 | 43.3±3.3 <sup>a</sup> | 89.2±11.5 <sup>ab</sup> | 117.5±5.4 <sup>a</sup> |

819 Values within a column marked with different superscript in each column differ  
820 significantly at  $p < 0.05$  [Fishers LSD]. Each value represented as mean  $\pm$  SD are the  
821 mean of three replications.
